# Supplementary material
Source: Springer Nature journal article supplement (https://www.springermedizin.de/resource/supplementary/12943_2009_548_MOESM10_ESM.pdf/9554946)

**A**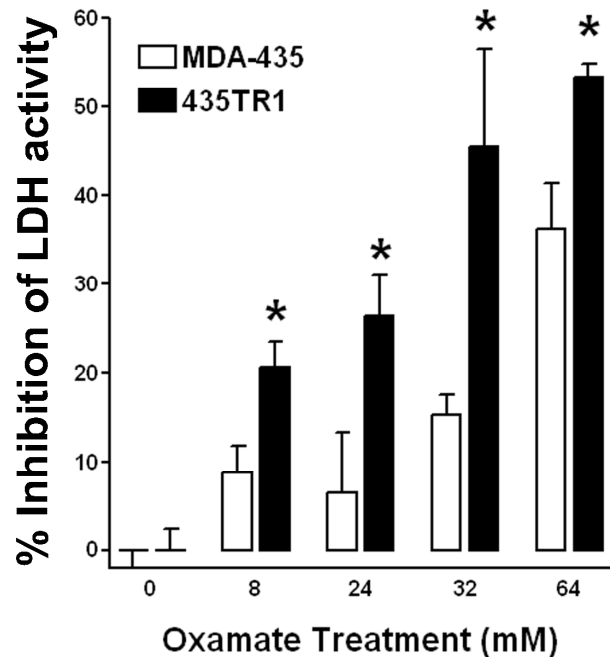**B**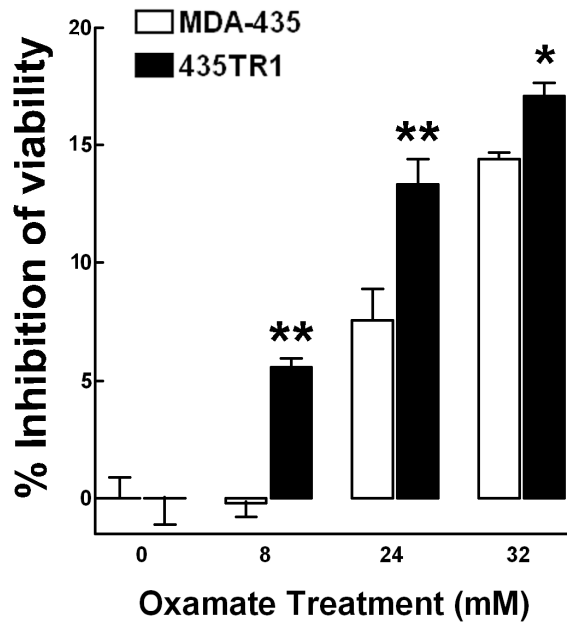

Supplement: MOESM10 [file 9554946]
